# Supplementary material for: A Typology of Food Environments in the Pacific Region and Their Relationship to Diet Quality in Solomon Islands
Source: MDPI journal article supplement (doi:10.3390/foods10112592), 2021-10-27
Supplement: s1 [file s1]

## Supplementary Tables and Figures

Supplementary Table S1: Diversity of food environments utilised Nationally, by geographic location and wealth groups.

|                     | % HHs that are urban | % HHs that are rural | Mean number of FE sub-types accessed |                     | % HHs accessing all 5 FEs |                      | % HHs accessing cultivated FE |                    | % HHs accessing wild FE |                    | % HHs accessing kin and community FE |                        | % HHs accessing informal retail FE |                      | % HHs accessing formal retail FE |                    |
|---------------------|----------------------|----------------------|--------------------------------------|---------------------|---------------------------|----------------------|-------------------------------|--------------------|-------------------------|--------------------|--------------------------------------|------------------------|------------------------------------|----------------------|----------------------------------|--------------------|
|                     |                      |                      | Mean                                 | SE                  | %                         | SE                   | %                             | SE                 | %                       | SE                 | %                                    | SE                     | %                                  | SE                   | %                                | SE                 |
| National            | 17.6                 | 82.4                 | 6.4                                  | 0.06                | 45.2                      | 1.9                  | 90.6                          | 1.1                | 74.9                    | 1.8                | 86.2                                 | 1.2                    | 86.0                               | 1.4                  | 82.6                             | 1.6                |
| Urban               | 100.0                | 0.0                  | 5.7                                  | 0.08                | 14.7                      | 2.0                  | 53.9                          | 2.8                | 20.8                    | 2.4                | 70.6                                 | 2.0                    | 97.5                               | 0.6                  | 98.9                             | 0.6                |
| Rural               | 0.0                  | 100.0                | 6.5                                  | 0.07                | 51.7                      | 2.1                  | 98.4                          | 0.4                | 86.5                    | 1.8                | 89.5                                 | 1.4                    | 83.6                               | 1.7                  | 79.1                             | 1.9                |
| <b>Provinces</b>    |                      |                      |                                      |                     |                           |                      |                               |                    |                         |                    |                                      |                        |                                    |                      |                                  |                    |
| Choiseul            | 2.7                  | 97.3                 | 6.6                                  | 0.07 <sup>b</sup>   | 62.6                      | 4.9 <sup>d</sup>     | 95.8                          | 0.8 <sup>a,b</sup> | 85.3                    | 2.0 <sup>a,b</sup> | 92.1                                 | 1.4 <sup>c,d</sup>     | 85.1                               | 2.2 <sup>b,c</sup>   | 92.9                             | 2.2 <sup>d</sup>   |
| Western             | 13.8                 | 86.2                 | 6.3                                  | 0.16 <sup>b</sup>   | 54.2                      | 3.5 <sup>c,d</sup>   | 93.6                          | 1.0 <sup>a</sup>   | 81.4                    | 1.9 <sup>a,b</sup> | 83.2                                 | 2.2 <sup>b</sup>       | 82.9                               | 3.0 <sup>b,c</sup>   | 94.1                             | 1.9 <sup>d</sup>   |
| Isabel              | 3.5                  | 96.6                 | 6.3                                  | 0.15 <sup>b</sup>   | 49.2                      | 5.3 <sup>b,c,d</sup> | 99.3                          | 0.5 <sup>a,b</sup> | 91.5                    | 1.7 <sup>b</sup>   | 84.6                                 | 4.0 <sup>a,b,c,d</sup> | 73.6                               | 4.3 <sup>a,b,c</sup> | 90.2                             | 3.6 <sup>c,d</sup> |
| Central             | 6.3                  | 93.7                 | 6.1                                  | 0.20 <sup>a,b</sup> | 39.9                      | 2.3 <sup>b</sup>     | 97.0                          | 1.3 <sup>a,b</sup> | 87.8                    | 4.3 <sup>a,b</sup> | 94.1                                 | 1.2 <sup>d</sup>       | 73.1                               | 4.4 <sup>a,b</sup>   | 69.0                             | 3.5 <sup>b,c</sup> |
| Rennel-Bellona      | 0.0                  | 100.0                | 5.3                                  | 0.07                | 16.1                      | 4.1 <sup>a</sup>     | 99.6                          | 0.3 <sup>b</sup>   | 81.1                    | 4.7 <sup>a,b</sup> | 98.7                                 | 0.3                    | 65.1                               | 3.7 <sup>a</sup>     | 41.6                             | 9.8 <sup>a,b</sup> |
| Guadalcanal         | 17.5                 | 82.5                 | 6.7                                  | 0.19 <sup>b,c</sup> | 45.0                      | 3.4 <sup>b,c,d</sup> | 93.5                          | 2.1 <sup>a</sup>   | 76.0                    | 4.1 <sup>a</sup>   | 83.7                                 | 3.0 <sup>b,c</sup>     | 85.1                               | 3.9 <sup>a,b,c</sup> | 83.4                             | 3.9 <sup>c,d</sup> |
| Malaita             | 3.6                  | 96.4                 | 6.5                                  | 0.17 <sup>b,c</sup> | 54.6                      | 5.3 <sup>b,c,d</sup> | 98.0                          | 0.8 <sup>a,b</sup> | 80.3                    | 4.5 <sup>a,b</sup> | 90.0                                 | 3.4 <sup>b,c,d</sup>   | 89.6                               | 2.7 <sup>b,c</sup>   | 82.2                             | 2.7 <sup>c,d</sup> |
| Makira              | 4.8                  | 95.2                 | 6.2                                  | 0.11 <sup>b</sup>   | 32.3                      | 5.2 <sup>a,b,c</sup> | 98.5                          | 1.3 <sup>a,b</sup> | 85.5                    | 2.8 <sup>a,b</sup> | 94.5                                 | 0.9 <sup>d</sup>       | 88.9                               | 2.3 <sup>c</sup>     | 45.2                             | 6.0 <sup>a</sup>   |
| Temotu              | 7.8                  | 92.2                 | 7.0                                  | 0.11 <sup>c</sup>   | 59.9                      | 3.6 <sup>d</sup>     | 98.2                          | 1.3 <sup>a,b</sup> | 95.7                    | 2.8 <sup>a,b</sup> | 94.2                                 | 1.5 <sup>c,d</sup>     | 85.7                               | 3.9 <sup>a,b,c</sup> | 73.3                             | 3.7 <sup>b,c</sup> |
| Honiara             | 100.0                | 0.0                  | 5.6                                  | 0.06 <sup>a</sup>   | 3.4                       | 0.7                  | 38.1                          | 2.1                | 7.6                     | 1.3                | 67.1                                 | 2.1 <sup>a</sup>       | 97.2                               | 0.7                  | 99.7                             | 0.2                |
| <b>Wealth group</b> |                      |                      |                                      |                     |                           |                      |                               |                    |                         |                    |                                      |                        |                                    |                      |                                  |                    |
| Lowest              | 2.3                  | 97.7                 | 6.0                                  | 0.10 <sup>a</sup>   | 36.7                      | 2.6 <sup>a</sup>     | 97.4                          | 0.9 <sup>a</sup>   | 84.6                    | 2.5 <sup>b</sup>   | 88.5                                 | 2.0 <sup>a,b</sup>     | 80.1                               | 2.0 <sup>a</sup>     | 62.2                             | 3.6                |
| 2                   | 7.4                  | 92.6                 | 6.3                                  | 0.09 <sup>a,b</sup> | 48.5                      | 3.1 <sup>b,c</sup>   | 96.3                          | 0.7 <sup>a</sup>   | 84.0                    | 1.9 <sup>b</sup>   | 88.3                                 | 1.6 <sup>b</sup>       | 84.7                               | 2.0 <sup>a,b,c</sup> | 78.0                             | 2.6                |
| 3                   | 14.9                 | 85.1                 | 6.4                                  | 0.11 <sup>a,b</sup> | 51.7                      | 3.3 <sup>c</sup>     | 94.1                          | 1.0 <sup>a</sup>   | 76.9                    | 2.6 <sup>a,b</sup> | 85.7                                 | 2.7 <sup>a,b</sup>     | 86.3                               | 1.8 <sup>b</sup>     | 88.5                             | 1.9 <sup>a</sup>   |
| 4                   | 24.8                 | 75.3                 | 6.6                                  | 0.09 <sup>b</sup>   | 48.0                      | 3.2 <sup>b,c</sup>   | 88.4                          | 1.5                | 71.5                    | 2.9 <sup>a</sup>   | 87.2                                 | 1.8 <sup>a,b</sup>     | 87.0                               | 2.7 <sup>a,b</sup>   | 91.7                             | 1.6 <sup>a</sup>   |
| Highest             | 39.5                 | 60.5                 | 6.5                                  | 0.11 <sup>a,b</sup> | 39.4                      | 2.9 <sup>a,b</sup>   | 76.1                          | 2.3                | 56.9                    | 3.5                | 81.2                                 | 1.8 <sup>a</sup>       | 91.9                               | 1.7 <sup>c</sup>     | 92.3                             | 1.6 <sup>a</sup>   |

FE, food environment. HH, household. Means or proportions sharing a superscript letter

Supplementary Table S2: Proportion of total quantity of food acquired from different food environments Nationally, by geographic location and wealth groups.

|                   |                                  | National    | Urban       | Rural       | Provinces   |             |             |             |             |             |             |             |             |             | Wealth group  |             |             |             |                |
|-------------------|----------------------------------|-------------|-------------|-------------|-------------|-------------|-------------|-------------|-------------|-------------|-------------|-------------|-------------|-------------|---------------|-------------|-------------|-------------|----------------|
|                   |                                  |             |             |             | Choiseul    | Western     | Isabel      | Central     | Rennel.     | Guadal.     | Malaita     | Makira      | Temotu      | Honiara     | 1<br>(lowest) | 2           | 3           | 4           | 5<br>(highest) |
| Cultivated        | Gardens and subsistence          | 52.1        | 17.6        | 55.7        | 54.7        | 50.6        | 63.2        | 62.2        | 48.1        | 51.9        | 56.4        | 56.4        | 37.8        | 8.3         | 59.1          | 57.4        | 55.7        | 50.5        | 39.8           |
|                   | Plantations and commercial       | 7.8         | 0.6         | 8.5         | 8.1         | 6.5         | 5.9         | 4.8         | 16.5        | 9.3         | 7.4         | 13.9        | 9.4         | 0.1         | 10.1          | 8.8         | 7.9         | 7.0         | 5.5            |
|                   | <b>Cultivated - total</b>        | <b>59.9</b> | <b>18.2</b> | <b>64.2</b> | <b>62.8</b> | <b>57.1</b> | <b>69.1</b> | <b>67.0</b> | <b>64.6</b> | <b>61.2</b> | <b>63.7</b> | <b>70.3</b> | <b>47.2</b> | <b>8.4</b>  | <b>69.3</b>   | <b>66.2</b> | <b>63.6</b> | <b>57.5</b> | <b>45.3</b>    |
| Wild              | Bush and forests                 | 4.7         | 0.6         | 5.2         | 1.9         | 2.1         | 2.2         | 4.4         | 8.0         | 5.8         | 5.1         | 4.2         | 18.5        | 0.2         | 5.9           | 4.8         | 4.0         | 4.8         | 4.0            |
|                   | Sea and reefs                    | 8.0         | 1.2         | 8.7         | 9.2         | 13.3        | 11.4        | 10.9        | 6.8         | 3.4         | 7.1         | 7.1         | 11.2        | 0.1         | 6.8           | 8.5         | 8.7         | 9.1         | 7.0            |
|                   | Rivers, lakes and streams        | 0.7         | 0.1         | 0.8         | 0.6         | 0.2         | 0.4         | 0.1         | 7.4         | 2.1         | 0.3         | 0.9         | 0.4         | 0.0         | 1.5           | 0.5         | 0.4         | 0.5         | 0.7            |
|                   | Estuaries and mangroves          | 1.3         | 0.1         | 1.4         | 0.9         | 0.9         | 3.4         | 1.1         | 0.2         | 0.0         | 2.6         | 0.3         | 0.9         | 0.0         | 0.7           | 1.3         | 1.5         | 1.5         | 1.6            |
|                   | <b>Wild - total</b>              | <b>14.8</b> | <b>1.9</b>  | <b>16.1</b> | <b>12.7</b> | <b>16.6</b> | <b>17.4</b> | <b>16.5</b> | <b>22.3</b> | <b>11.3</b> | <b>15.1</b> | <b>12.4</b> | <b>31.1</b> | <b>0.3</b>  | <b>14.8</b>   | <b>15.1</b> | <b>14.6</b> | <b>15.8</b> | <b>13.3</b>    |
| Kin and community | Family and community             | 8.5         | 7.7         | 8.5         | 10.4        | 8.5         | 5.7         | 7.8         | 10.3        | 7.8         | 7.8         | 11.4        | 12.1        | 7.0         | 8.1           | 8.1         | 7.7         | 7.7         | 10.1           |
|                   | Social and cultural gatherings   | 0.2         | 0.1         | 0.2         | 0.3         | 0.1         | 0.2         | 0.2         | 0.1         | 0.1         | 0.3         | 0.3         | 0.3         | 0.0         | 0.2           | 0.2         | 0.3         | 0.3         | 0.1            |
|                   | <b>Kin and community - total</b> | <b>8.7</b>  | <b>7.8</b>  | <b>8.8</b>  | <b>10.8</b> | <b>8.6</b>  | <b>6.0</b>  | <b>8.0</b>  | <b>10.3</b> | <b>7.9</b>  | <b>8.1</b>  | <b>11.7</b> | <b>12.3</b> | <b>7.0</b>  | <b>8.3</b>    | <b>8.3</b>  | <b>8.0</b>  | <b>8.0</b>  | <b>10.2</b>    |
| Retail - informal | Canteen                          | 2.5         | 6.8         | 2.1         | 1.9         | 1.5         | 1.9         | 1.0         | 0.8         | 3.9         | 2.1         | 2.1         | 2.2         | 8.0         | 1.6           | 1.9         | 2.4         | 2.6         | 3.8            |
|                   | Opportunistic/mobile vendor      | 1.0         | 1.8         | 1.0         | 0.7         | 1.4         | 0.3         | 0.5         | 0.2         | 0.8         | 1.1         | 0.5         | 2.1         | 2.4         | 0.8           | 0.9         | 1.0         | 1.1         | 1.4            |
|                   | Local market                     | 4.2         | 18.5        | 2.7         | 4.3         | 5.5         | 0.8         | 2.3         | 0.1         | 3.5         | 4.4         | 1.4         | 2.0         | 17.0        | 2.2           | 2.4         | 3.2         | 5.2         | 7.2            |
|                   | <b>Informal retail - total</b>   | <b>7.7</b>  | <b>27.1</b> | <b>5.7</b>  | <b>6.9</b>  | <b>8.4</b>  | <b>3.0</b>  | <b>3.8</b>  | <b>1.2</b>  | <b>8.2</b>  | <b>7.6</b>  | <b>4.0</b>  | <b>6.3</b>  | <b>27.4</b> | <b>4.6</b>    | <b>5.2</b>  | <b>6.6</b>  | <b>8.9</b>  | <b>12.3</b>    |
| Retail - formal   | Central market                   | 2.6         | 19.7        | 0.8         | 0.5         | 0.9         | 0.0         | 0.1         | 0.0         | 3.9         | 1.2         | 0.0         | 0.6         | 28.8        | 0.4           | 0.8         | 1.6         | 2.8         | 7.3            |
|                   | Store or shop                    | 5.4         | 22.8        | 3.6         | 5.5         | 6.6         | 4.2         | 2.0         | 1.4         | 6.9         | 3.6         | 1.0         | 2.0         | 25.9        | 2.1           | 3.6         | 4.7         | 6.1         | 10.0           |
|                   | Co-operative                     | 0.0         | 0.1         | 0.0         | 0.0         | 0.0         | 0.2         | 0.3         | 0.0         | 0.0         | 0.0         | 0.0         | 0.0         | 0.0         | 0.0           | 0.0         | 0.0         | 0.1         | 0.0            |
|                   | Restaurant                       | 0.1         | 1.1         | 0.0         | 0.          |             |             |             |             |             |             |             |             |             |               |             |             |             |                |

Supplementary Table S3: Proportion of total value of food acquired from different food environments Nationally, by geographic location and wealth groups.

|                   |                                  | National    | Urban       | Rural       | Provinces   |             |             |             |             |             |             |             |             |             | Wealth group  |              |              |              |                |
|-------------------|----------------------------------|-------------|-------------|-------------|-------------|-------------|-------------|-------------|-------------|-------------|-------------|-------------|-------------|-------------|---------------|--------------|--------------|--------------|----------------|
|                   |                                  |             |             |             | Choiseul    | Western     | Isabel      | Central     | Rennel.     | Guadal.     | Malaita     | Makira      | Temotu      | Honiara     | 1<br>(lowest) | 2            | 3            | 4            | 5<br>(highest) |
| Cultivated        | Gardens and subsistence          | 31.0        | 8.0         | 37.0        | 30.8        | 29.7        | 38.6        | 38.5        | 26.0        | 28.0        | 42.9        | 35.6        | 24.3        | 3.8         | 42.32         | 38.3         | 36.56        | 31.6         | 20.15          |
|                   | Plantations and commercial       | 2.0         | 0.5         | 2.4         | 3.2         | 1.7         | 1.7         | 1.4         | 3.8         | 2.3         | 1.9         | 5.0         | 3.2         | 0.1         | 2.9           | 2.38         | 2.05         | 1.78         | 1.36           |
|                   | <b>Cultivated - total</b>        | <b>33.0</b> | <b>8.4</b>  | <b>39.4</b> | <b>33.9</b> | <b>31.4</b> | <b>40.4</b> | <b>39.9</b> | <b>29.8</b> | <b>30.2</b> | <b>44.7</b> | <b>40.6</b> | <b>27.6</b> | <b>4.0</b>  | <b>45.22</b>  | <b>40.68</b> | <b>38.61</b> | <b>33.38</b> | <b>21.52</b>   |
| Wild              | Bush and forests                 | 2.8         | 0.3         | 3.4         | 1.3         | 1.5         | 2.5         | 3.2         | 5.8         | 2.8         | 2.0         | 3.4         | 18.6        | 0.1         | 4.09          | 2.95         | 2.21         | 2.8          | 1.99           |
|                   | Sea and reefs                    | 7.3         | 1.2         | 8.8         | 9.3         | 11.4        | 12.0        | 13.5        | 7.3         | 3.5         | 7.6         | 7.1         | 10.2        | 0.2         | 7.95          | 8.71         | 8.27         | 7.51         | 5.94           |
|                   | Rivers, lakes and streams        | 0.5         | 0.1         | 0.6         | 0.6         | 0.3         | 0.5         | 0.1         | 2.2         | 1.1         | 0.3         | 1.0         | 0.3         | 0.0         | 0.88          | 0.53         | 0.41         | 0.39         | 0.33           |
|                   | Estuaries and mangroves          | 1.2         | 0.0         | 1.4         | 0.8         | 0.7         | 3.1         | 1.1         | 0.1         | 0.0         | 2.7         | 0.3         | 0.7         | 0.0         | 0.5           | 1.05         | 1.26         | 1.6          | 1.09           |
|                   | <b>Wild - total</b>              | <b>11.7</b> | <b>1.7</b>  | <b>14.3</b> | <b>11.9</b> | <b>13.9</b> | <b>18.0</b> | <b>17.9</b> | <b>15.3</b> | <b>7.4</b>  | <b>12.6</b> | <b>11.8</b> | <b>29.7</b> | <b>0.3</b>  | <b>13.42</b>  | <b>13.25</b> | <b>12.16</b> | <b>12.3</b>  | <b>9.35</b>    |
| Kin and community | Family and community             | 11.9        | 7.0         | 13.2        | 14.2        | 11.5        | 9.7         | 14.0        | 31.5        | 11.2        | 12.0        | 19.6        | 16.6        | 5.8         | 15.65         | 13.08        | 11.74        | 10.33        | 11.27          |
|                   | Social and cultural gatherings   | 0.3         | 0.2         | 0.3         | 0.3         | 0.5         | 0.2         | 0.2         | 0.1         | 0.3         | 0.4         | 0.3         | 0.4         | 0.1         | 0.33          | 0.26         | 0.48         | 0.38         | 0.21           |
|                   | <b>Kin and community - total</b> | <b>12.2</b> | <b>7.2</b>  | <b>13.5</b> | <b>14.5</b> | <b>12.0</b> | <b>9.9</b>  | <b>14.2</b> | <b>31.6</b> | <b>11.5</b> | <b>12.4</b> | <b>19.8</b> | <b>17.0</b> | <b>5.9</b>  | <b>15.98</b>  | <b>13.34</b> | <b>12.22</b> | <b>10.71</b> | <b>11.47</b>   |
| Retail - informal | Canteen                          | 8.6         | 10.9        | 8.0         | 7.8         | 5.4         | 8.7         | 4.7         | 8.1         | 12.5        | 6.5         | 13.6        | 6.7         | 11.5        | 7.75          | 7.94         | 8.51         | 8.59         | 9.22           |
|                   | Opportunistic/mobile vendor      | 1.2         | 1.7         | 1.1         | 0.8         | 1.5         | 0.5         | 0.5         | 0.3         | 1.1         | 1.0         | 1.1         | 2.4         | 2.2         | 0.99          | 1.28         | 1.18         | 1.25         | 1.39           |
|                   | Local market                     | 4.1         | 10.2        | 2.6         | 4.1         | 4.6         | 0.9         | 2.2         | 0.1         | 4.1         | 3.6         | 2.8         | 2.5         | 9.1         | 2.56          | 2.64         | 3.25         | 4.61         | 5.62           |
|                   | <b>Informal retail - total</b>   | <b>14.0</b> | <b>22.8</b> | <b>11.7</b> | <b>12.7</b> | <b>11.5</b> | <b>10.1</b> | <b>7.4</b>  | <b>8.5</b>  | <b>17.7</b> | <b>11.2</b> | <b>17.5</b> | <b>11.5</b> | <b>22.8</b> | <b>11.29</b>  | <b>11.86</b> | <b>12.94</b> | <b>14.45</b> | <b>16.22</b>   |
| Retail - formal   | Central market                   | 3.4         | 11.1        | 1.4         | 0.6         | 0.8         | 0.0         | 0.1         | 0.0         | 4.8         | 2.0         | 0.0         | 0.7         | 14.4        | 0.84          | 1.1          | 1.99         | 3.39         | 6.19           |
|                   | Store or shop                    | 22.0        | 40.1        | 17.3        | 24.5        | 26.8        | 20.3        | 10.6        | 13.4        | 25.2        | 15.5        | 8.2         | 11.5        | 42.1        | 11.18         | 16.97        | 19.59        | 22.68        | 29.16          |
|                   | Co-operative                     | 0.2         | 0.1         | 0.2         | 0.0         | 0.2         |             |             |             |             |             |             |             |             |               |              |              |              |                |

Supplementary Table S4: Proportion of food groups (quantity) acquired from different food environments in Solomon Islands nationally.

|                   |                                  | Breads and cereals | Roots and tubers | Vegetables | Fruits | Nuts | Fish and seafood | Meat | Eggs and dairy | Oils and fats | Discretionary food | Other |
|-------------------|----------------------------------|--------------------|------------------|------------|--------|------|------------------|------|----------------|---------------|--------------------|-------|
| Cultivated        | Gardens and subsistence          | 0.5                | 81.4             | 62.4       | 37.6   | 28.8 | 0.5              | 9.5  | 25.2           | 0.8           | 7.5                | 0.8   |
|                   | Plantations and commercial       | 0.0                | 0.5              | 0.6        | 35.8   | 11.7 | 0.2              | 1.4  | 7.6            | 0.0           | 0.2                | 1.9   |
|                   | <b>Cultivated - total</b>        | 0.5                | 81.8             | 63.0       | 73.4   | 40.5 | 0.7              | 11.0 | 32.8           | 0.8           | 7.7                | 2.7   |
| Wild              | Bush and forests                 | 0.1                | 2.9              | 8.1        | 9.9    | 41.7 | 2.7              | 9.1  | 5.3            | 0.1           | 0.2                | 0.2   |
|                   | Sea and reefs                    | 0.0                | 0.1              | 1.6        | 0.8    | 0.1  | 57.7             | 0.0  | 0.2            | 0.0           | 0.0                | 0.0   |
|                   | Rivers, lakes and streams        | 0.0                | 0.1              | 1.1        | 0.0    | 0.0  | 4.1              | 0.0  | 0.0            | 0.0           | 0.1                | 0.0   |
|                   | Estuaries and mangroves          | 0.0                | 0.5              | 0.4        | 0.2    | 0.0  | 7.5              | 0.0  | 0.0            | 0.0           | 0.0                | 0.0   |
|                   | <b>Wild - total</b>              | 0.2                | 3.6              | 11.2       | 10.9   | 41.8 | 72.0             | 9.1  | 5.5            | 0.1           | 0.3                | 0.2   |
| Kin and community | Family and community             | 17.2               | 7.5              | 5.8        | 5.6    | 7.7  | 12.2             | 27.9 | 12.1           | 9.4           | 14.0               | 8.3   |
|                   | Social and cultural gatherings   | 0.3                | 0.2              | 0.1        | 0.2    | 0.0  | 0.2              | 1.0  | 0.1            | 0.3           | 0.4                | 0.3   |
|                   | <b>Kin and community - total</b> | 17.5               | 7.7              | 5.9        | 5.7    | 7.7  | 12.4             | 28.9 | 12.2           | 9.7           | 14.4               | 8.5   |
| Retail - informal | Canteen                          | 21.7               | 0.2              | 0.4        | 0.3    | 0.6  | 2.2              | 1.6  | 2.6            | 21.8          | 21.5               | 23.2  |
|                   | Opportunistic/mobile vendor      | 0.9                | 0.7              | 1.2        | 0.8    | 0.7  | 1.7              | 1.9  | 1.7            | 2.5           | 5.3                | 0.8   |
|                   | Local market                     | 1.0                | 3.6              | 9.1        | 4.1    | 5.8  | 4.5              | 2.7  | 6.6            | 3.0           | 6.2                | 0.8   |
|                   | <b>Informal retail - total</b>   | 23.6               | 4.4              | 10.7       | 5.2    | 7.1  | 8.4              | 6.1  | 10.9           | 27.2          | 33.0               | 24.8  |
| Retail - formal   | Central market                   | 0.2                | 1.7              | 7.4        | 3.8    | 1.8  | 2.8              | 2.0  | 4.5            | 0.6           | 1.7                | 0.4   |
|                   | Store or shop                    | 54.9               | 0.2              | 1.2        | 0.3    | 0.3  | 2.8              | 35.8 | 27.8           | 58.0          | 38.0               | 49.8  |
|                   | Co-operative                     | 0.3                | 0.0              | 0.0        | 0.0    | 0.0  | 0.0              | 0.1  | 0.2            | 0.7           | 0.3                | 0.3   |
|                   | Restaurant                       | 0.5                | 0.0              | 0.0        | 0.0    | 0.0  | 0.0              | 2.3  | 1.9            | 0.6           | 2.4                | 3.9   |
|                   | Supermarket                      | 0.2                | 0.0              | 0.0        | 0.0    | 0.0  | 0.0              | 2.9  | 1.0            | 0.2           | 0.2                | 0.3   |
|                   | <b>Formal retail - total</b>     | 56.0               | 1.9              | 8.6        | 4.2    | 2.1  | 5.7              | 43.0 | 35.4           | 60.0          | 42.6               | 54.6  |
|                   | Undetermined                     | 2.1                | 0.5              | 0.7        | 0.6    | 0.7  | 0.9              | 1.9  | 3.2            | 2.2           | 2.1                | 9.1   |

Supplementary Table S5: Proportion of food groups (value) acquired from different food environments in Solomon Islands nationally.

|                   |                                  | Breads and cereals | Roots and tubers | Vegetables | Fruits | Nuts | Fish and seafood | Meat | Eggs and dairy | Oils and fats | Discretionary food | Other |
|-------------------|----------------------------------|--------------------|------------------|------------|--------|------|------------------|------|----------------|---------------|--------------------|-------|
| Cultivated        | Gardens and subsistence          | 0.5                | 78.7             | 57.0       | 50.7   | 33.7 | 1.0              | 24.7 | 12.5           | 0.6           | 1.6                | 0.9   |
|                   | Plantations and commercial       | 0.0                | 0.5              | 0.6        | 19.7   | 6.7  | 0.1              | 4.0  | 10.1           | 0.0           | 0.1                | 1.7   |
|                   | <b>Cultivated - total</b>        | 0.5                | 79.2             | 57.7       | 70.3   | 40.4 | 1.1              | 28.6 | 22.5           | 0.6           | 1.6                | 2.7   |
| Wild              | Bush and forests                 | 0.1                | 3.7              | 6.5        | 5.5    | 33.4 | 1.9              | 6.6  | 1.8            | 0.0           | 0.2                | 0.2   |
|                   | Sea and reefs                    | 0.0                | 0.2              | 3.1        | 1.1    | 0.1  | 38.9             | 0.0  | 0.1            | 0.0           | 0.0                | 0.0   |
|                   | Rivers, lakes and streams        | 0.0                | 0.2              | 0.9        | 0.0    | 0.0  | 2.0              | 0.0  | 0.0            | 0.0           | 0.0                | 0.0   |
|                   | Estuaries and mangroves          | 0.0                | 0.5              | 0.7        | 0.6    | 0.0  | 5.2              | 0.0  | 0.0            | 0.0           | 0.0                | 0.0   |
|                   | <b>Wild - total</b>              | 0.1                | 4.5              | 11.2       | 7.2    | 33.5 | 48.0             | 6.6  | 1.9            | 0.0           | 0.2                | 0.2   |
| Kin and community | Family and community             | 17.1               | 8.4              | 5.8        | 7.2    | 8.4  | 13.9             | 23.0 | 9.0            | 8.4           | 12.6               | 8.3   |
|                   | Social and cultural gatherings   | 0.3                | 0.3              | 0.1        | 0.2    | 0.0  | 0.4              | 0.6  | 0.2            | 0.3           | 0.4                | 0.7   |
|                   | <b>Kin and community - total</b> | 17.4               | 8.6              | 5.9        | 7.3    | 8.4  | 14.3             | 23.6 | 9.3            | 8.6           | 13.0               | 9.0   |
| Retail - informal | Canteen                          | 17.8               | 0.2              | 0.8        | 0.3    | 1.3  | 8.0              | 1.1  | 3.7            | 19.3          | 24.9               | 12.8  |
|                   | Opportunistic/mobile vendor      | 0.6                | 0.7              | 1.2        | 0.9    | 0.8  | 1.5              | 2.0  | 1.0            | 1.8           | 3.0                | 1.4   |
|                   | Local market                     | 0.8                | 4.0              | 9.9        | 5.7    | 7.0  | 6.0              | 2.2  | 3.1            | 2.7           | 3.7                | 1.6   |
|                   | <b>Informal retail - total</b>   | 19.2               | 4.9              | 11.9       | 6.9    | 9.1  | 15.5             | 5.3  | 7.8            | 23.7          | 31.6               | 15.9  |
| Retail - formal   | Central market                   | 0.2                | 2.1              | 9.9        | 6.4    | 4.7  | 7.4              | 1.2  | 3.7            | 0.4           | 0.9                | 0.5   |
|                   | Store or shop                    | 58.7               | 0.2              | 2.6        | 0.7    | 3.0  | 12.3             | 26.8 | 44.6           | 63.1          | 47.6               | 25.1  |
|                   | Co-operative                     | 0.5                | 0.0              | 0.0        | 0.0    | 0.1  | 0.1              | 0.0  | 0.3            | 0.9           | 0.5                | 0.2   |
|                   | Restaurant                       | 0.5                | 0.0              | 0.1        | 0.1    | 0.1  | 0.1              | 1.7  | 1.4            | 0.8           | 1.9                | 10.5  |
|                   | Supermarket                      | 0.3                | 0.0              | 0.1        | 0.1    | 0.0  | 0.0              | 2.8  | 2.1            | 0.2           | 0.6                | 0.3   |
|                   | <b>Formal retail - total</b>     | 60.2               | 2.3              | 12.7       | 7.2    | 7.8  | 19.9             | 32.5 | 52.1           | 65.5          | 51.4               | 36.6  |
|                   | Undetermined                     | 2.5                | 0.5              | 0.6        | 1.0    | 0.9  | 1.2              | 3.4  | 6.4            | 1.6           | 2.2                | 35.7  |

Supplementary Table S6: Effect of reliance on different FEs (independent variables) on two measures of diet quality (fruit and vegetable acquisition, and ultra-processed food acquisition), full model including potential confounders.

|                                               | Outcome variable: fruit and vegetable acquisition (g/AME/day) |       |       |            |                                             |                      |                      |
|-----------------------------------------------|---------------------------------------------------------------|-------|-------|------------|---------------------------------------------|----------------------|----------------------|
| Independent variables                         | $\beta$<br>coefficient                                        | SE    | t     | P<br>value | P value for<br>log-<br>transformed<br>model | CI<br>lower<br>bound | CI<br>upper<br>bound |
| Reliance on formal retail FE (binary)         | -178.84                                                       | 50.10 | -3.57 | 0.001      | 0.016                                       | -278.14              | -79.55               |
| Reliance on informal retail FE (binary)       | -37.65                                                        | 52.32 | -0.72 | 0.473      | 0.270                                       | -141.34              | 66.04                |
| Reliance on cultivated FE (binary)            | 118.70                                                        | 36.17 | 3.28  | 0.001      | 0.002                                       | 47.02                | 190.38               |
| Reliance on wild FE (binary)                  | 239.08                                                        | 40.22 | 5.94  | <0.001     | <0.001                                      | 159.36               | 318.81               |
| Reliance on kin and community FE (binary)     | 192.01                                                        | 38.58 | 4.98  | <0.001     | <0.001                                      | 115.56               | 268.47               |
| Rural (vs urban)                              | 177.51                                                        | 42.83 | 4.14  | <0.001     | 0.282                                       | 92.62                | 262.40               |
| Female household head (vs male)               | 111.35                                                        | 36.25 | 3.07  | 0.003      | 0.002                                       | 39.51                | 183.20               |
| Expenditure quintile (poorest)                |                                                               |       |       |            |                                             |                      |                      |
| 2                                             | 58.75                                                         | 37.01 | 1.59  | 0.115      | 0.136                                       | -14.61               | 132.11               |
| 3                                             | 130.21                                                        | 42.15 | 3.09  | 0.003      | 0.005                                       | 46.67                | 213.75               |
| 4                                             | 201.79                                                        | 60.78 | 3.32  | 0.001      | <0.001                                      | 81.31                | 322.26               |
| 5 (richest)                                   | 240.37                                                        | 65.71 | 3.66  | <0.001     | 0.001                                       | 110.14               | 370.59               |
| Education level of household head (no school) |                                                               |       |       |            |                                             |                      |                      |
| Primary                                       | -31.03                                                        | 30.98 | -1.00 | 0.319      | 0.656                                       | -92.43               | 30.37                |
| Secondary +                                   | -26.87                                                        | 27.34 | -0.98 | 0.328      | 0.946                                       | -81.05               | 27.31                |
| Age of household head (years)                 | -4.62                                                         | 1.25  | -3.69 | <0.001     | 0.063                                       | -7.11                | -2.14                |
| HH size (number of members)                   | -33.55                                                        | 5.75  | -5.83 | <0.001     | <0.001                                      | -44.94               | -22.15               |
|                                               | Outcome variable: UPFs acquisition (g/AME/day)                |       |       |            |                                             |                      |                      |
| Reliance on formal retail FE (binary)         | 8.04                                                          | 1.41  | 5.69  | <0.001     | <0.001                                      | 5.24                 | 10.84                |
| Reliance on informal retail FE (binary)       | 5.47                                                          | 1.45  | 3.78  | <0.001     | 0.001                                       | 2.61                 | 8.34                 |
| Reliance on cultivated FE (binary)            | -2.68                                                         | 2.63  | -1.02 | 0.310      | 0.355                                       | -7.90                | 2.54                 |
| Reliance on wild FE (binary)                  | -3.59                                                         | 1.89  | -1.90 | 0.060      | 0.008                                       | -7.33                | 0.16                 |
| Reliance on kin and community FE (binary)     | 0.40                                                          | 2.09  | 0.19  | 0.847      | 0.263                                       | -3.74                | 4.55                 |
| Rural (vs urban)                              | -21.01                                                        | 2.88  | -7.30 | 0.000      | <0.001                                      | -26.72               | -15.31               |
| Female household head (vs male)               | 0.39                                                          | 2.07  | 0.19  | 0.851      | 0.891                                       | -3.71                | 4.49                 |
| Expenditure quintile (poorest)                |                                                               |       |       |            |                                             |                      |                      |
| 2                                             | 4.02                                                          | 1.02  | 3.95  | <0.001     | <0.001                                      | 2.00                 | 6.04                 |
| 3                                             | 9.45                                                          | 1.57  | 6.03  | <0.001     | <0.001                                      | 6.35                 | 12.55                |
| 4                                             | 14.75                                                         | 1.64  | 9.00  | <0.001     | <0.001                                      | 11.50                | 18.00                |
| 5 (richest)                                   | 29.51                                                         | 2.12  | 13.94 | <0.001     | <0.001                                      | 25.31                | 33.70                |
| Education level of household head (no school) |                                                               |       |       |            |                                             |                      |                      |
| Primary                                       | 2.02                                                          | 1.15  | 1.76  | 0.081      | 0.542                                       | -0.26                | 4.30                 |
| Secondary +                                   | 3.41                                                          | 1.16  | 2.93  | 0.004      | 0.025                                       | 1.10                 | 5.71                 |
| Age of household head (years)                 | -0.16                                                         | 0.05  | -3.27 | 0.001      | <0.001                                      | -0.25                | -0.06                |
| HH size (number of members)                   | -1.74                                                         | 0.26  | -6.75 | <0.001     | <0.001                                      | -2.25                | -1.23                |

Shaded cells indicates where use of the log-transformed model P-value would result in different interpretation of results.
